# Supplementary material for: Are Patients with Psoriasis and Psoriatic Arthritis Undertreated? A Population-Based Study from Southern Italy
Source: MDPI journal article supplement (doi:10.3390/jcm10153431), 2021-07-31
Supplement: s1 [file s1]

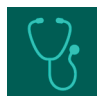

**Table S1.** Different therapy lines and eligibility criteria to biologic treatment in patients with psoriasis or psoriatic arthritis.

| Disease                    | Therapy Lines                                                                                                                                                                                                                                                                                                                                                                                                                                                                                                                                                                |                                                                                                                                                                                                                                                                                                                                                                                                                                                                                                                                                               |                                                                                                                                                                                                                                                                                                                                                                                                                                      | Eligibility Criteria to Biologic Treatment                                                                                                                                                                                                                                                                                                                                                                                                                                                                        |
|----------------------------|------------------------------------------------------------------------------------------------------------------------------------------------------------------------------------------------------------------------------------------------------------------------------------------------------------------------------------------------------------------------------------------------------------------------------------------------------------------------------------------------------------------------------------------------------------------------------|---------------------------------------------------------------------------------------------------------------------------------------------------------------------------------------------------------------------------------------------------------------------------------------------------------------------------------------------------------------------------------------------------------------------------------------------------------------------------------------------------------------------------------------------------------------|--------------------------------------------------------------------------------------------------------------------------------------------------------------------------------------------------------------------------------------------------------------------------------------------------------------------------------------------------------------------------------------------------------------------------------------|-------------------------------------------------------------------------------------------------------------------------------------------------------------------------------------------------------------------------------------------------------------------------------------------------------------------------------------------------------------------------------------------------------------------------------------------------------------------------------------------------------------------|
|                            | I Line                                                                                                                                                                                                                                                                                                                                                                                                                                                                                                                                                                       | II Line                                                                                                                                                                                                                                                                                                                                                                                                                                                                                                                                                       | III Line                                                                                                                                                                                                                                                                                                                                                                                                                             |                                                                                                                                                                                                                                                                                                                                                                                                                                                                                                                   |
| <i>Psoriasis</i>           | Mild psoriasis:                                                                                                                                                                                                                                                                                                                                                                                                                                                                                                                                                              |                                                                                                                                                                                                                                                                                                                                                                                                                                                                                                                                                               |                                                                                                                                                                                                                                                                                                                                                                                                                                      |                                                                                                                                                                                                                                                                                                                                                                                                                                                                                                                   |
|                            | <p>Topical corticosteroids</p> <ul style="list-style-type: none"> <li>Betamethasone/antibiotics fixed combination</li> <li>Dexamethasone/antibiotics fixed combination</li> </ul> <p>Systemic glucocorticoid:</p> <ul style="list-style-type: none"> <li>Dexamethasone i.v.</li> </ul> <p>Other drugs used in psoriasis (topic administration):</p> <ul style="list-style-type: none"> <li>Calcipotriol</li> <li>Calcipotriol/Betamethasone fixed combination</li> <li>Calcitriol</li> <li>Tacalcitol</li> <li>Tazarotene</li> <li>Dithranol</li> <li>Methoxsalen</li> </ul> | <p>Psoriasis moderate-severe grade<sup>11,16</sup>:</p> <p><b>DMARDs:</b></p> <ul style="list-style-type: none"> <li>MTX;</li> <li>Cyclosporine (severe psoriasis in patients after failure of conventional therapy or when it was not appropriate)</li> </ul> <p>Systemic glucocorticoid:</p> <ul style="list-style-type: none"> <li>Deflazacort</li> </ul> <p>Antipsoriatics for systemic use</p> <ul style="list-style-type: none"> <li>Acitretin</li> </ul> <p>Other antipsoriatic treatments:</p> <ul style="list-style-type: none"> <li>PUVA</li> </ul> | <p><b>bDMARDs<sup>11,16</sup>:</b></p> <ul style="list-style-type: none"> <li>Secukinumab</li> <li>Ixekizumab</li> <li>Adalimumab (40-80 mg)</li> <li>Infliximab</li> <li>Certolizumab</li> <li>Etanercept</li> <li>Ustekinumab</li> <li>Brodalumab</li> <li>Risankizumab</li> <li>Tildrakizumab</li> <li>Guselkumab</li> </ul> <p><b>tsDMARDs<sup>11,16</sup>:</b></p> <ul style="list-style-type: none"> <li>Apremilast</li> </ul> | <ul style="list-style-type: none"> <li>Inadequate response, contraindications or intolerance to other systemic treatments (e.g. cyclosporine, MTX or PUVA) (Infliximab, Etanercept, Ustekinumab)</li> <li>Adult patients with moderate or severe plaque psoriasis who were candidates for systemic therapy (Secukinumab, Ixekizumab, Adalimumab)</li> <li>Comorbidities that could be treated with the same drug (e.g. psoriatic arthritis, Crohn's disease, ulcerative colitis, uveitis)<sup>11</sup></li> </ul> |
| <i>Psoriatic arthritis</i> | <p><b>csDMARDs:</b></p> <ul style="list-style-type: none"> <li>Leflunomide<sup>16</sup></li> <li>MTX<sup>16</sup></li> <li>Sulfasalazine and Cyclosporine (according to guidelines, but with no indication for psoriatic arthritis in SmPCs<sup>16,39</sup>)</li> </ul>                                                                                                                                                                                                                                                                                                      | <p><b>bDMARDs<sup>16</sup>:</b></p> <ul style="list-style-type: none"> <li>Abatacept</li> <li>Adalimumab (40 mg)</li> <li>Certolizumab pegol</li> <li>Etanercept</li> <li>Golimumab</li> <li>Infliximab</li> </ul>                                                                                                                                                                                                                                                                                                                                            | <p><b>tsDMARDs<sup>16,40</sup>:</b></p> <ul style="list-style-type: none"> <li>Apremilast monotherapy or + csDMARDs, in adult patients who have had an inadequate response or who have been intolerant</li> </ul>                                                                                                                                                                                                                    | <ul style="list-style-type: none"> <li>Failure or inadequate response at least to a csDMARDs as monotherapy or as fixed combination for 3 months<sup>39,41</sup> (bDMARD as monotherapy or +MTX)<sup>16</sup></li> </ul>                                                                                                                                                                                                                                                                                          |

|                                                                                                                                                                                                                             |                                                                                                              |                          |                                                                                                                                                          |
|-----------------------------------------------------------------------------------------------------------------------------------------------------------------------------------------------------------------------------|--------------------------------------------------------------------------------------------------------------|--------------------------|----------------------------------------------------------------------------------------------------------------------------------------------------------|
| NSAIDs <sup>40</sup>                                                                                                                                                                                                        | <ul style="list-style-type: none"> <li>• Ixekizumab</li> <li>• Secukinumab</li> <li>• Ustekinumab</li> </ul> | to a prior DMARD therapy | <ul style="list-style-type: none"> <li>• Patients for whom additional systemic therapy for psoriatic skin lesions is not required (Abatacept)</li> </ul> |
| <b>Glucocorticoids<sup>16</sup>:</b> <ul style="list-style-type: none"> <li>• Deflazacort</li> <li>• Dexamethasone</li> </ul> (additional therapy for a short period of time as relief of an acute episode or exacerbation) | <ul style="list-style-type: none"> <li>• Methylprednisolone acetate (suspension for injection)</li> </ul>    |                          | Severe active disease (≥5 swollen joints and high inflammatory indexes) and aggressive (e.g. anatomical joint damage) <sup>39</sup>                      |

**Legend:** bDMARDs: Biological Disease Modifying Anti-rheumatic Drugs; csDMARDs: Conventional Synthetic Disease Modifying Anti-rheumatic Drugs; MTX: methotrexate; NSAIDs: Non-steroidal anti-inflammatory drugs; NYHA: New York Heart Association; PUVA: psoralen and ultraviolet A; SmPCs : summary of product characteristics; tsDMARDs: Targeted Synthetic Disease Modifying Anti-rheumatic Drugs.
